# Supplementary material
Source: Springer Nature journal article supplement (https://www.springermedizin.de/resource/supplementary/13256_2011_2132_MOESM4_ESM.pdf/9648992)

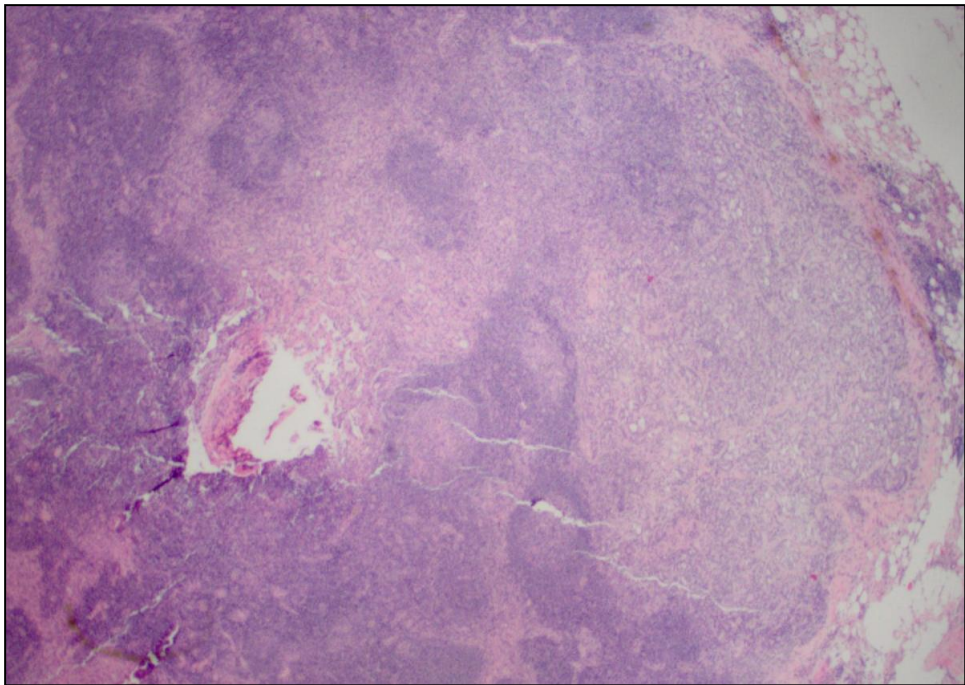

Supplement: MOESM4 [file 9648992]
